# Supplementary material for: Belantamab Mafodotin in Patients with Relapsed/Refractory Multiple Myeloma: Results of the Compassionate Use or the Expanded Access Program in Spain
Source: MDPI journal article supplement (doi:10.3390/cancers15112964), 2023-05-29

Supplementary Table S1. Treatments administered after therapy with belantamab mafodotin

| Treatment                                 | No. of patients | %    |
|-------------------------------------------|-----------------|------|
| PI-based                                  | 18              | 28.1 |
| IMiD-based                                | 10              | 15.6 |
| Anti-CD38 MoAb-based                      | 2               | 3.1  |
| Combination of PI + IMiD                  | 7               | 11   |
| Combination of PI + IMiD + Anti-CD38 MoAb | 1               | 1.6  |
| Other regimens                            | 26              | 40.6 |

Note: Treatments and values thereof are based on the treatment patient received at first therapy after belantamab. Frequencies are based on N=64 patients. Abbreviations: PI, proteasome inhibitor; IMiD, immunomodulatory drug; MoAb, monoclonal antibody.

Supplementary Figure S1. (A) Progression-free survival by response category. (B) Overall survival by response category.

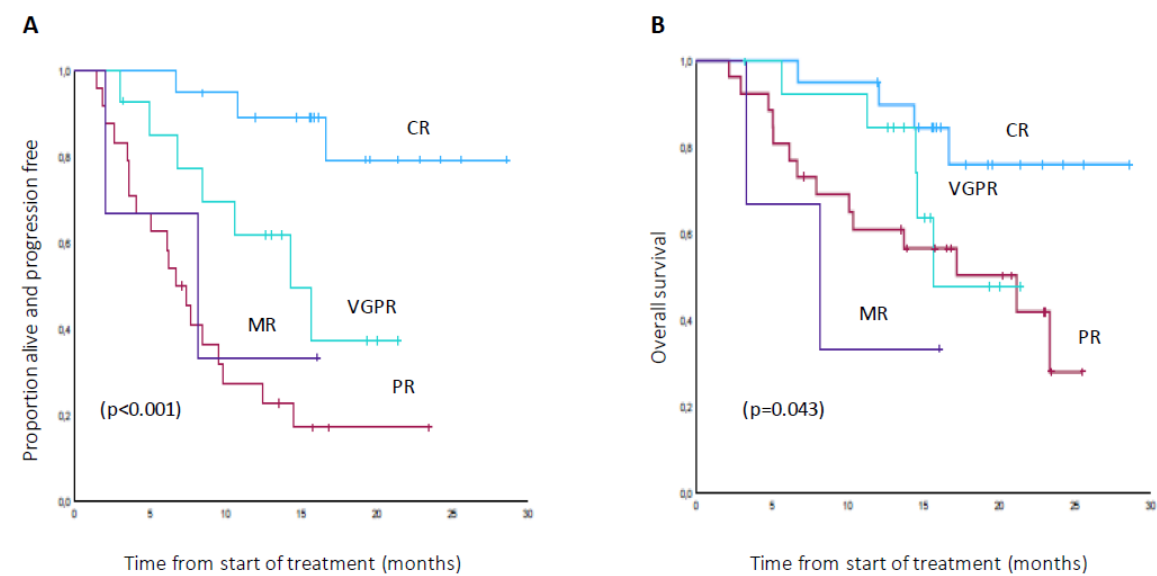

Supplementary Figure S2. (A) Duration of response. (B) Progression-free survival 2.

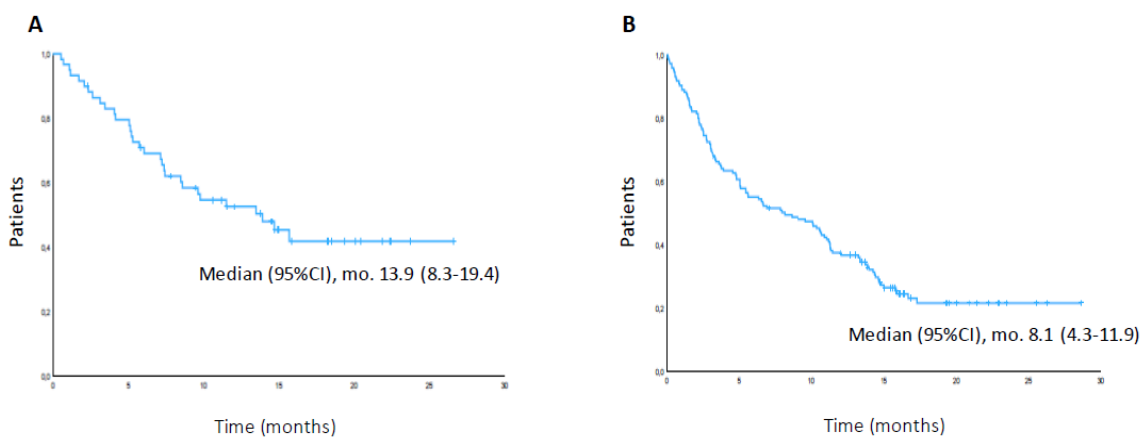

Supplement: s1 [file s1]
